# Supplementary material
Source: publisher figshare collection journal article supplement (https://acs.figshare.com/ndownloader/files/5061172)

Figure S1.  $^1\text{H}$ ,  $^{13}\text{C}$  HSQC NMR of Hex-PdG (500 MHz,  $\text{DMSO-}d_6$ ).

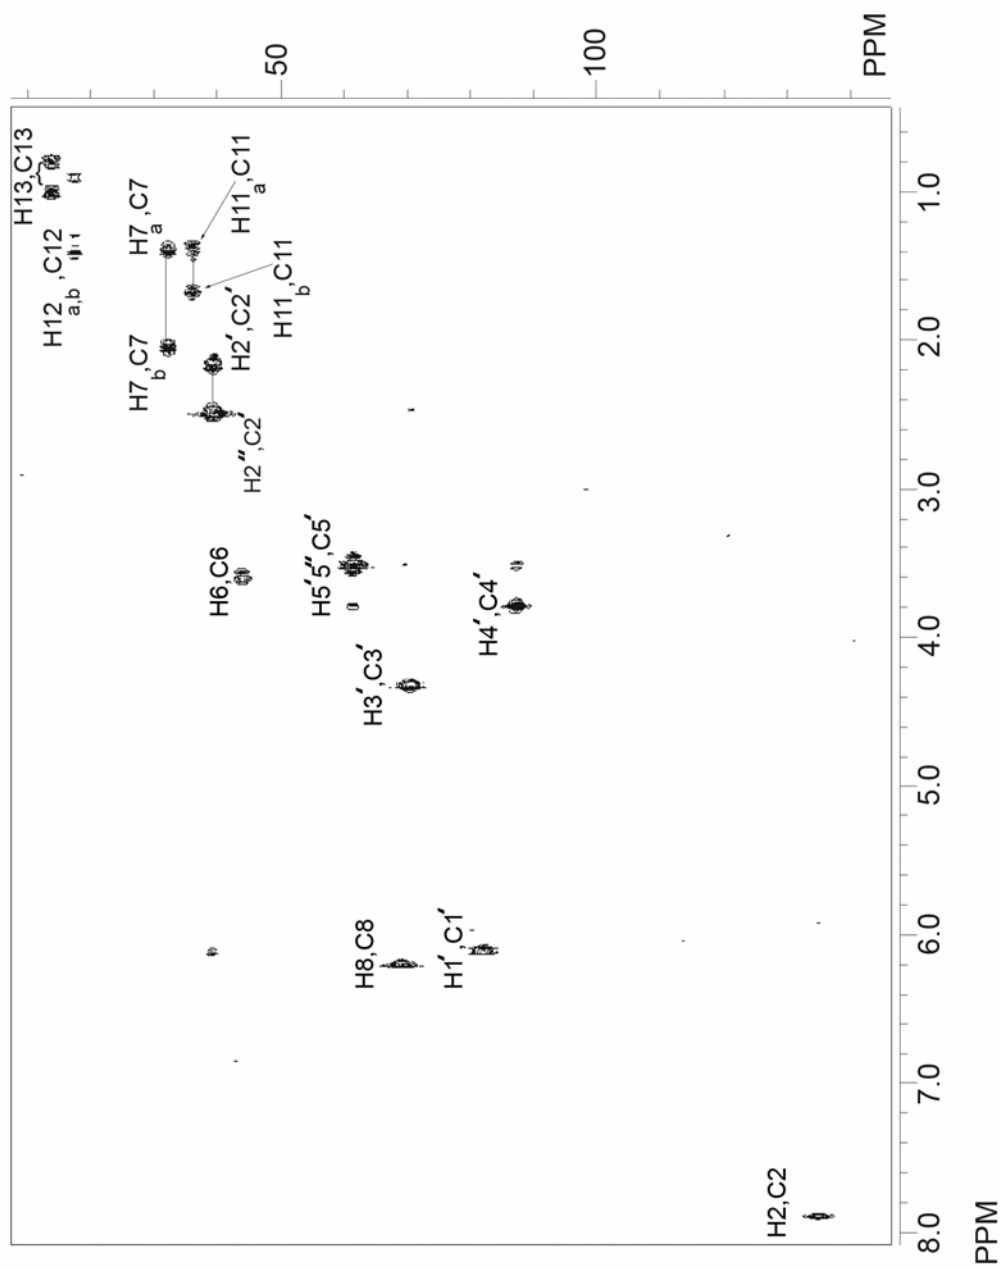

Supplement: Supplementary file 1 [file 5061172]
